# Supplementary material for: Resolved Proteinuria May Attenuate the Risk of Heart Failure: A Nationwide Population-Based Cohort Study
Source: MDPI journal article supplement (doi:10.3390/jpm13121662), 2023-11-28

## SUPPLEMENTARY MATERIAL

Table S1. Baseline characteristics of the study participants according to heart failure incidence

| Variable                             | Total             | Non-heart failure Group | Heart failure Group | p-value |
|--------------------------------------|-------------------|-------------------------|---------------------|---------|
| Number of participants (%)           | 1,703,651         | 1,628,587 (95.59)       | 75,064 (4.41)       |         |
| Age, years                           | 43.94 ± 12.05     | 43.36 ± 11.72           | 56.42 ± 12.21       | <0.001  |
| Sex                                  |                   |                         |                     | <0.001  |
| Men                                  | 1,177,934 (69.14) | 1,131,200 (69.46)       | 46,734 (62.26)      |         |
| Women                                | 525,717 (30.86)   | 497,387 (30.54)         | 28,330 (37.74)      |         |
| Body mass index (kg/m <sup>2</sup> ) | 23.62 ± 3.03      | 23.58 ± 3.02            | 24.54 ± 3.13        | <0.001  |
| Household income                     |                   |                         |                     | <0.001  |
| Q1, lowest                           | 254,366 (14.93)   | 239,237 (14.69)         | 15,129 (20.15)      |         |
| Q2                                   | 632,196 (37.11)   | 606,831 (37.26)         | 25,365 (33.79)      |         |
| Q3                                   | 562,916 (33.04)   | 540,644 (33.20)         | 22,272 (29.67)      |         |
| Q4, highest                          | 254,173 (14.92)   | 241,875 (14.85)         | 12,298 (16.38)      |         |
| Smoking                              |                   |                         |                     | <0.001  |
| Never                                | 980,235 (57.54)   | 931,602 (57.20)         | 48,633 (64.79)      |         |
| Former                               | 212,652 (12.48)   | 203,918 (12.52)         | 8734 (11.64)        |         |
| Current                              | 510,764 (29.98)   | 493,067 (30.28)         | 17,697 (23.58)      |         |
| Alcohol consumption (days/week)      |                   |                         |                     | <0.001  |

|                              |                   |                   |                |        |
|------------------------------|-------------------|-------------------|----------------|--------|
| <3                           | 1,139,835 (66.91) | 1,085 216 (66.64) | 54,619 (72.76) |        |
| ≥3                           | 563 816 (33.09)   | 543,371 (33.36)   | 20,445 (27.24) |        |
| Regular exercise (days/week) |                   |                   |                | <0.001 |
| <3                           | 1,374,142 (80.66) | 1,315,735 (80.79) | 58,407 (77.81) |        |
| ≥3                           | 329 509 (19.34)   | 312,852 (19.21)   | 16,657 (22.19) |        |
| Comorbidities (%)            |                   |                   |                |        |
| Hypertension                 | 769,339 (45.16)   | 715,526 (43.94)   | 53,813 (71.69) | <0.001 |
| Diabetes mellitus            | 239,866 (14.08)   | 219,385 (13.47)   | 20,481 (27.28) | <0.001 |
| Dyslipidemia                 | 421,156 (24.72)   | 390,910 (24.00)   | 30,246 (40.29) | <0.001 |
| Atrial fibrillation          | 4448 (0.26)       | 3035 (0.19)       | 1413 (1.88)    | <0.001 |
| Cancer                       | 31,454 (1.85)     | 28,618 (1.76)     | 2836 (3.78)    | <0.001 |
| Renal disease                | 16,806 (0.99)     | 14,316 (0.88)     | 2490 (3.32)    | <0.001 |
| Charlson Comorbidity Index   |                   |                   |                | <0.001 |
| 0                            | 677,492 (39.77)   | 661,878 (40.64)   | 15,614 (20.80) |        |
| 1                            | 691,773 (40.61)   | 662,774 (40.70)   | 28,999 (38.63) |        |
| ≥2                           | 334,386 (19.63)   | 303,935 (18.66)   | 30,451 (40.57) |        |
| Follow-up duration (years)   | 14.04 ± 2.36      | 14.28 ± 1.95      | 8.87 ± 3.97    | <0.001 |

Q, quartiles.

Table S2. Multivariable Cox analysis for incident heart failure according to proteinuria significance

| 2005-2006                |           |                   |               |                              |                     |                     |
|--------------------------|-----------|-------------------|---------------|------------------------------|---------------------|---------------------|
| Proteinuria significance | Total (n) | Heart failure (n) | IR (per 1000) | HR (95% Confidence Interval) |                     |                     |
|                          |           |                   |               | Model 1                      | Model 2             | Model 3             |
| Negative                 | 1679508   | 72662             | 3.08          | 1 (ref)                      | 1 (ref)             | 1 (ref)             |
| 1+                       | 16460     | 1415              | 6.4           | 2.102 (1.994,2.215)          | 1.478 (1.402,1.558) | 1.463 (1.387,1.542) |
| 2+                       | 6175      | 764               | 9.58          | 3.175 (2.957,3.410)          | 2.000 (1.863,2.149) | 1.960 (1.825,2.105) |
| 3+                       | 1261      | 182               | 11.59         | 3.883 (3.358,4.491)          | 2.576 (2.227,2.979) | 2.495 (2.157,2.887) |
| 4+                       | 247       | 41                | 13.88         | 4.673 (3.441,6.347)          | 3.872 (2.851,5.26)  | 3.702 (2.725,5.028) |
|                          | p-value   |                   |               | <.0001                       | <.0001              | <.0001              |
| 2003-2004                |           |                   |               |                              |                     |                     |
| Proteinuria significance | Total (n) | Heart failure (n) | IR (per 1000) | HR (95% Confidence Interval) |                     |                     |
|                          |           |                   |               | Model 1                      | Model 2             | Model 3             |
| Negative                 | 1681523   | 72984             | 3.09          | 1 (ref)                      | 1 (ref)             | 1 (ref)             |
| 1+                       | 15350     | 1313              | 6.33          | 2.070 (1.960,2.186)          | 1.416 (1.341,1.496) | 1.395 (1.321,1.474) |
| 2+                       | 5519      | 599               | 8.24          | 2.714 (2.505,2.942)          | 1.715 (1.582,1.859) | 1.667 (1.538,1.807) |
| 3+                       | 1115      | 144               | 10.42         | 3.470 (2.947,4.087)          | 2.116 (1.797,2.492) | 2.021 (1.716,2.381) |
| 4+                       | 144       | 24                | 13.41         | 4.509 (3.024,6.724)          | 3.011 (2.018,4.492) | 3.092 (2.072,4.614) |
|                          | p-value   |                   |               | <.0001                       | <.0001              | <.0001              |

Model 1 was adjusted for age and sex.

Model 2 was adjusted for age, sex, body mass index, household income, smoking, alcohol consumption, physical activity, history of diabetes mellitus, dyslipidemia, atrial fibrillation, cancer, and renal disease.

Model 3 was adjusted for age, sex, body mass index, household income, smoking, alcohol consumption, physical activity, history of diabetes mellitus, dyslipidemia, atrial fibrillation, cancer, renal disease, and Charlson Comorbidity Index.

IR, incidence rate; HR, hazard ratio; CI, confidence interval;

Table S3. Multivariable Cox analysis for incident heart failure according to proteinuria status

| Renal disease      |           |                   |               |                        | Non-Renal disease  |             |                   |               |                        |
|--------------------|-----------|-------------------|---------------|------------------------|--------------------|-------------|-------------------|---------------|------------------------|
| Proteinuria status | Total (n) | Heart failure (n) | IR (per 1000) | HR (95% CI) Model 3    | Proteinuria status | Total (n)   | Heart failure (n) | IR (per 1000) | HR (95% CI) Model 3    |
| Free               | 14682     | 2008              | 10.67         | 1.000 (ref)            | Free               | 16472<br>83 | 69268             | 2.99          | 1.000 (ref)            |
| Resolved           | 785       | 154               | 16.41         | 1.639<br>(1.390,1.932) | Resolved           | 16758       | 1232              | 5.39          | 1.272<br>(1.202,1.346) |
| Developed          | 699       | 165               | 21            | 2.029<br>(1.729,2.381) | Developed          | 18859       | 1543              | 6.08          | 1.472<br>(1.400,1.549) |
| Persistent         | 640       | 163               | 22.97         | 2.614<br>(2.221,3.076) | Persistent         | 3945        | 531               | 10.48         | 2.045<br>(1.878,2.228) |
| p-value            |           |                   |               | <.0001                 | p-value            |             |                   |               | <.0001                 |

Model 1 was adjusted for age and sex.

Model 2 was adjusted for age, sex, body mass index, household income, smoking, alcohol consumption, physical activity, history of diabetes mellitus, dyslipidemia, atrial fibrillation, cancer, and renal disease.

Model 3 was adjusted for age, sex, body mass index, household income, smoking, alcohol consumption, physical activity, history of diabetes mellitus, dyslipidemia, atrial fibrillation, cancer, renal disease, and Charlson Comorbidity Index.

IR, incidence rate; HR, hazard ratio; CI, confidence interval;

Table S4. Multivariable Cox analysis for incident heart failure according to changes in proteinuria status (landmark analysis).

| Proteinuria status | Total (n) | Heart failure (n) | IR (per 1000) | HR (95% Confidence Interval) |                     |                     |
|--------------------|-----------|-------------------|---------------|------------------------------|---------------------|---------------------|
|                    |           |                   |               | Model 1                      | Model 2             | Model 3             |
| Free               | 919044    | 189910            | 15.55         | 1 (ref)                      | 1 (ref)             | 1 (ref)             |
| Resolved           | 7488      | 2033              | 21.39         | 1.922 (1.822,2.027)          | 1.320 (1.251,1.393) | 1.304 (1.236,1.376) |
| Developed          | 8205      | 2493              | 24.79         | 2.148 (2.047,2.255)          | 1.517 (1.445,1.592) | 1.505 (1.434,1.580) |
| Persistent         | 986       | 542               | 55.22         | 4.049 (3.756,4.366)          | 2.226 (2.064,2.401) | 2.187 (2.028,2.359) |
| p-value            |           |                   |               | <.0001                       | <.0001              | <.0001              |

Model 1 was adjusted for age and sex.

Model 2 was adjusted for age, sex, body mass index, household income, smoking, alcohol consumption, physical activity, history of diabetes mellitus, dyslipidemia, atrial fibrillation, cancer, and renal disease.

Model 3 was adjusted for age, sex, body mass index, household income, smoking, alcohol consumption, physical activity, history of diabetes mellitus, dyslipidemia, atrial fibrillation, cancer, renal disease, and Charlson Comorbidity Index.

IR, incidence rate; HR, hazard ratio; CI, confidence interval;

Figure S1. Subgroup analysis for association of proteinuria status and heart failure occurrence

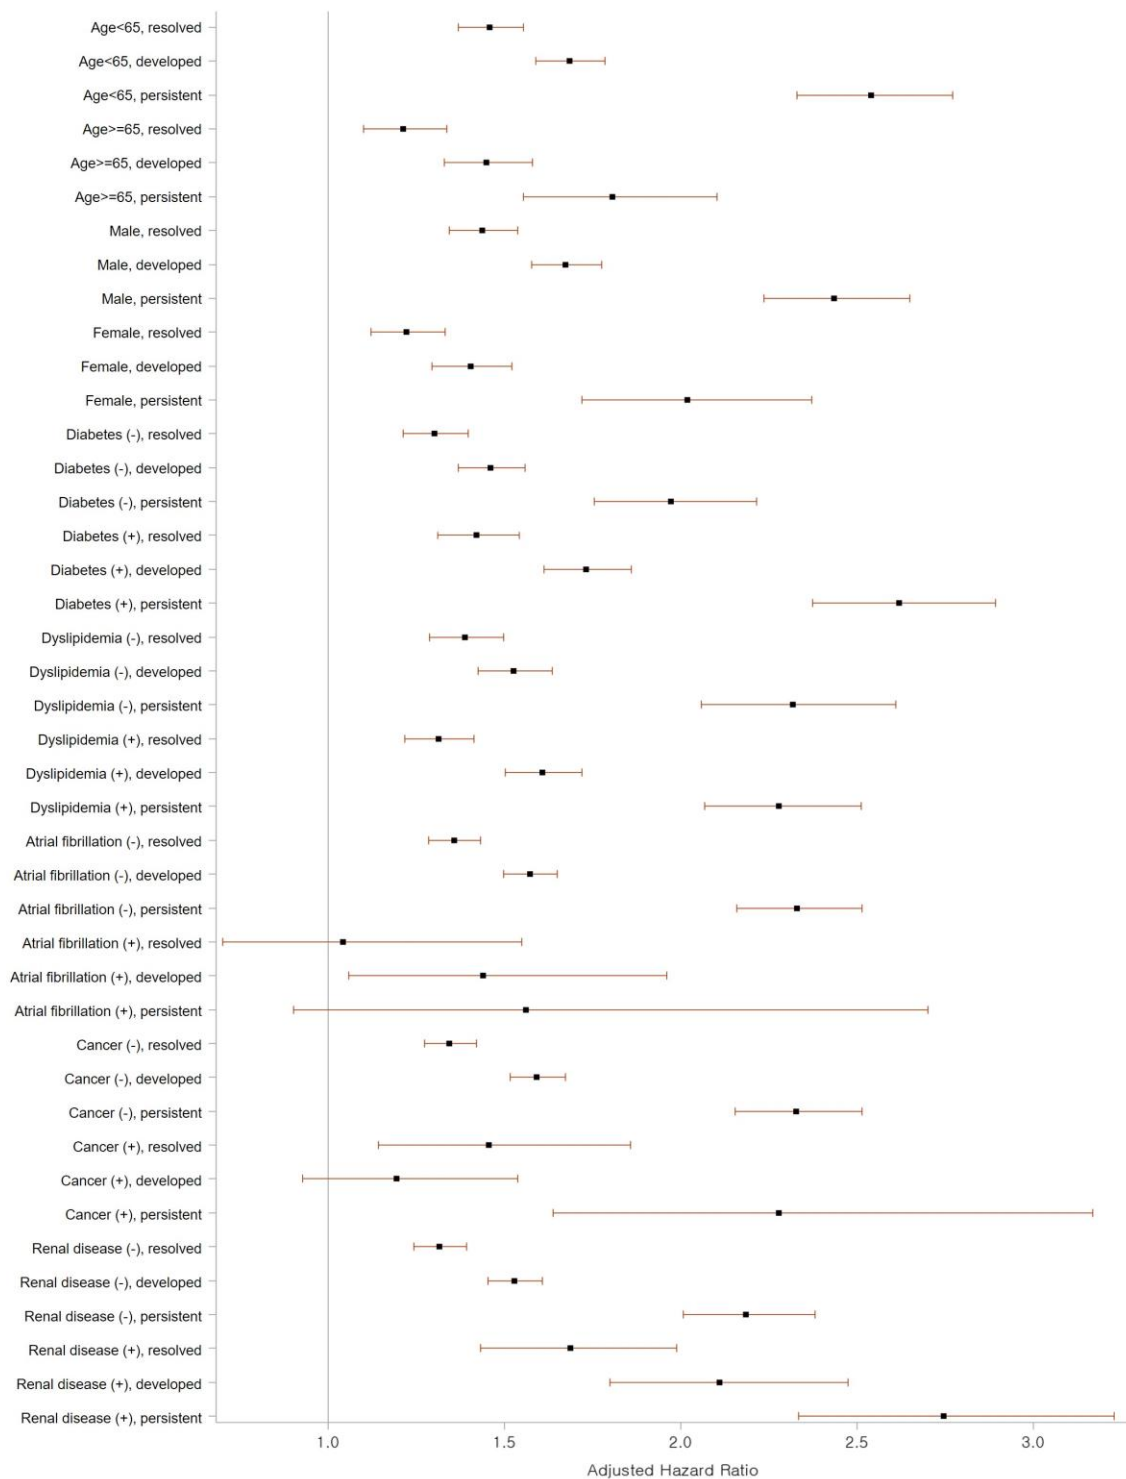

Supplement: s1 [file s1]
